# Supplementary material for: Nitrogen-doped carbon decorated Li4Ti5O12 composites as anode materials for high performance lithium-ion batteries
Source: Royal Society of Chemistry journal article supplement (doi:10.1039/c5ra05989e), 2015-01-01
Supplement: c5ra05989e1.pdf [file c5ra05989e1.pdf]

## Supporting Information

### **Nitrogen-doped carbon decorated $\text{Li}_4\text{Ti}_5\text{O}_{12}$ composites as anode materials for high performance lithium-ion batteries**

Feng Wang <sup>a</sup>, Liangcheng Luo <sup>a</sup>, Jun Du <sup>a</sup>, Liangui Guo <sup>a</sup>, Bihui Li <sup>a</sup>, Yu Ding <sup>a,b</sup> \*

<sup>a</sup> College of Chemistry and Materials Science, Hubei Engineering University, Xiaogan, 432000, China

<sup>b</sup> State Key Laboratory of Materials Processing and Die & Mould Technology, School of Materials Science and Engineering, Huazhong University of Science and Technology, Wuhan, 430074, China

\* Corresponding author. E-mail addresses: dy9802@126.com (Y. Ding).

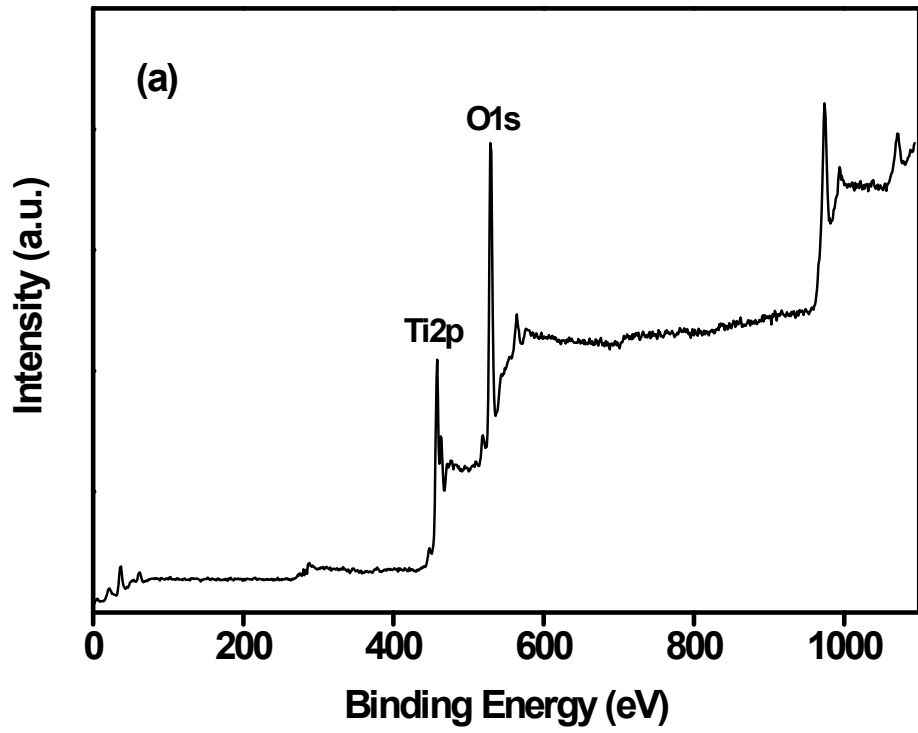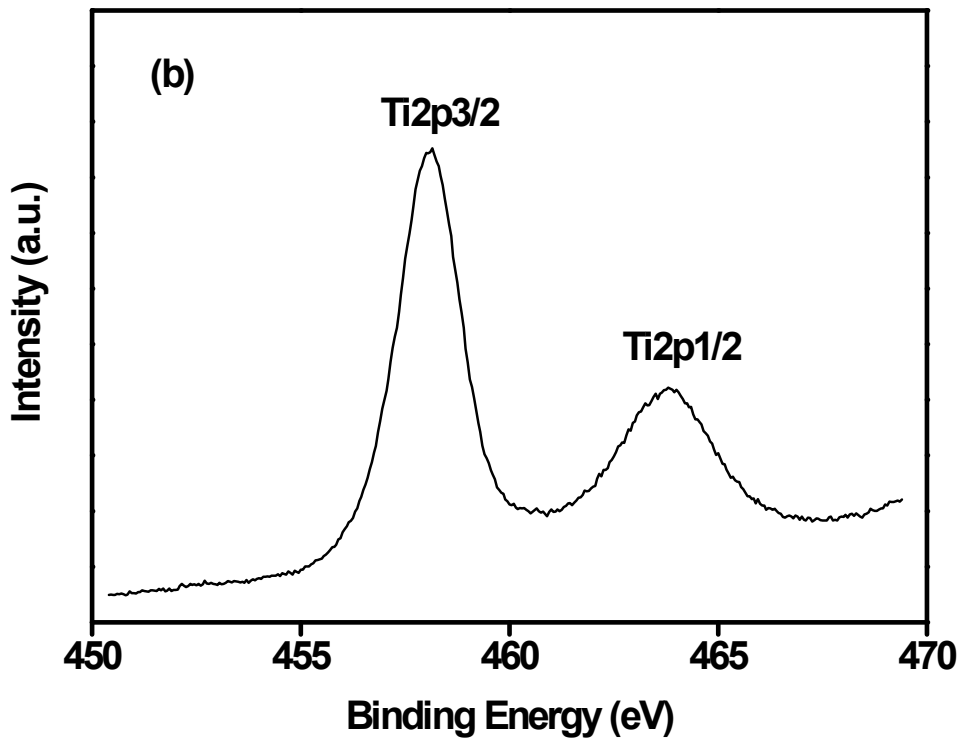

Figure S1 XPS of LTO

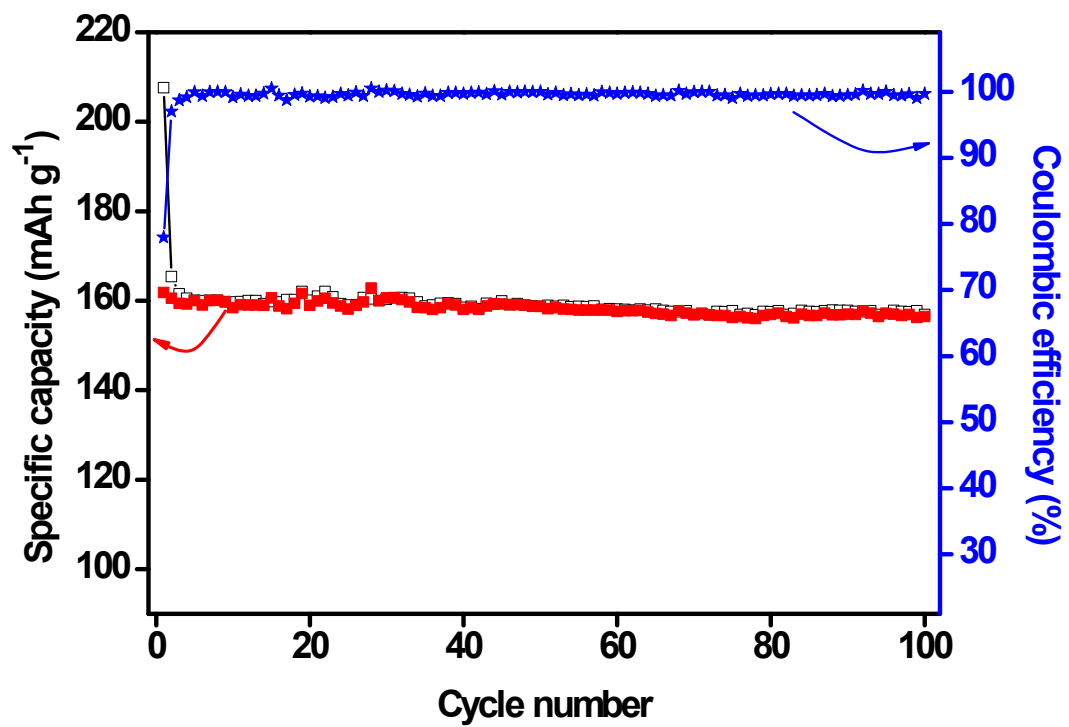

Figure S2 The cycling performance of LTO-2 at 1 C rate and the Coulombic efficiency of LTO-2
